# Supplementary material
Source: PubMed Central journal article supplement (PMC4178689)
Supplement: AEM.01087-14_zam999105671so1.pdf [file AEM.01087-14_zam999105671so1.pdf]

**Table S1. Summary of clone library derived from the midgut crypts of *Cavelerius saccharivorus*.**

| Locality            | Instar | Sex <sup>a</sup> | OTUs identified with      |                            | <i>Burkholderia</i><br>clade <sup>d</sup> | Accession No.     |
|---------------------|--------|------------------|---------------------------|----------------------------|-------------------------------------------|-------------------|
|                     |        |                  | 99% identity <sup>b</sup> | No. of clones <sup>c</sup> |                                           |                   |
| Okinawa Island      | adult  | F                | OK-1                      | 7                          | PBE                                       | AB916362-AB916368 |
|                     | adult  | M                | OK-2                      | 10                         | SBE                                       | AB916369-AB916378 |
|                     | adult  | M                | OK-3                      | 10                         | PBE                                       | AB916379-AB916388 |
| Kita-Daito Island   | 5th    | -                | KD-1                      | 10                         | SBE                                       | AB916425-AB916434 |
|                     | 5th    | -                | KD-2                      | 10                         | SBE                                       | AB916435-AB916444 |
| Minami-Daito Island | adult  | M                | MD-1                      | 6                          | SBE                                       | AB916406-AB916411 |
|                     | adult  | F                | MD-2                      | 6                          | BCC                                       | AB916412-AB916417 |
|                     | adult  | F                | MD-3                      | 7                          | SBE                                       | AB916418-AB916424 |
| Ishigaki Island     | 5th    | -                | IG-1                      | 7                          | SBE                                       | AB916389-AB916395 |
|                     | 5th    | -                | IG-2                      | 10                         | BCC                                       | AB916396-AB916405 |
| Yonaguni Island     | 5th    | -                | YG-1                      | 12                         | SBE                                       | AB916445-AB916456 |
|                     | 5th    | -                | YG-2                      | 7                          | SBE                                       | AB916457-AB916463 |

<sup>a</sup> F, female; M, male; -, undetermined.

<sup>b</sup> A single phylotype was detected from each individual.

<sup>c</sup> Total amount of sequenced clones.

<sup>d</sup> Each clade was defined in Fig. 2.

**Table S2. Illumina deep sequencing of *Burkholderia* phylotypes in the midgut crypts of *Cavelerius saccharivorus*.**

| Insect ID | No. of sequences (No. of OTUs) |                           |                  |                  |                  |                           |
|-----------|--------------------------------|---------------------------|------------------|------------------|------------------|---------------------------|
|           | Bacteria Total                 | <i>Burkholderia</i> Total | SBE <sup>a</sup> | BCC <sup>a</sup> | PBE <sup>a</sup> | Unclassified <sup>b</sup> |
| MD-I-1    | 34,734 (104)                   | 34,682 (99)               | 31,070 (3)       | 0                | 254 (1)          | 3,358 (95)                |
| MD-I-2    | 38,957 (126)                   | 38,781 (115)              | 34,747 (3)       | 0                | 0                | 4,034 (112)               |
| MD-I-3    | 26,208 (83)                    | 26,154 (74)               | 23,878 (2)       | 0                | 0                | 2,276 (72)                |
| MD-I-4    | 31,290 (85)                    | 31,075 (67)               | 19 (2)           | 0                | 29,437 (2)       | 1,619 (63)                |
| MD-I-5    | 29,446 (96)                    | 29,281 (79)               | 26,075 (3)       | 0                | 2 (1)            | 3,204 (75)                |
| MD-I-6    | 36,851 (118)                   | 36,462 (90)               | 32,909 (2)       | 0                | 3 (1)            | 3,550 (87)                |
| MD-I-7    | 16,767 (37)                    | 16,723 (27)               | 17 (2)           | 0                | 16,214 (1)       | 492 (24)                  |
| MD-I-8    | 20,372 (42)                    | 20,248 (31)               | 0                | 0                | 19,711 (1)       | 537 (30)                  |
| MD-I-9    | 30,331 (79)                    | 30,316 (74)               | 27,449 (2)       | 0                | 0                | 2,867 (72)                |
| MD-I-10   | 34,705 (91)                    | 34,473 (76)               | 31,604 (3)       | 0                | 2 (1)            | 2,867 (72)                |

<sup>a</sup> *Burkholderia* spp. classified with 99% identity against reference sequences shown in Fig. 2.

<sup>b</sup> *Burkholderia* spp. unclassified with less than 99% identity against reference sequences shown in Fig. 2.

**Table S3. Illumina deep sequencing profiles of the most dominant *Burkholderia* OTUs in each insect.**

| Sequence ID <sup>a</sup> | No. of sequences | Relative abundance (%) <sup>b</sup> | BLASTn search                                                |            |                    |
|--------------------------|------------------|-------------------------------------|--------------------------------------------------------------|------------|--------------------|
|                          |                  |                                     | Closest sequences <sup>c</sup> (Accession No. <sup>d</sup> ) | Identity % | Clade <sup>e</sup> |
| MD-I-1                   | 30,985           | 89.2                                | <i>Burkholderia</i> sp. BurkA_pop5 (JQ993996)                | 100        | SBE                |
| MD-I-2                   | 34,741           | 89.2                                | <i>Burkholderia</i> sp. MD-1 (AB916406)                      | 100        | SBE                |
| MD-I-3                   | 23,873           | 91.1                                | <i>Burkholderia</i> sp. MD-1 (AB916406)                      | 100        | SBE                |
| MD-I-4                   | 29,435           | 94.1                                | <i>Burkholderia</i> sp. OK-1 (AB916362)                      | 100        | PBE                |
| MD-I-5                   | 26,044           | 88.4                                | <i>Burkholderia</i> sp. MD-3 (AB916418)                      | 100        | SBE                |
| MD-I-6                   | 32,907           | 89.3                                | <i>Burkholderia</i> sp. MD-1 (AB916406)                      | 100        | SBE                |
| MD-I-7                   | 16,214           | 96.7                                | <i>Burkholderia</i> sp. OK-3 (AB916379)                      | 100        | PBE                |
| MD-I-8                   | 19,711           | 96.8                                | <i>Burkholderia</i> sp. OK-3 (AB916379)                      | 100        | PBE                |
| MD-I-9                   | 27,442           | 90.5                                | <i>Burkholderia</i> sp. BurkA_pop5 (JQ993996)                | 100        | SBE                |
| MD-I-10                  | 31,558           | 90.9                                | <i>Burkholderia</i> sp. MD-3 (AB916418)                      | 100        | SBE                |

<sup>a</sup> Same as the insect ID shown in Table S2.

<sup>b</sup> % rate of the given sequences/total numbers of sequences.

<sup>c</sup> Phylogenetic positions of the sequences are shown in Fig. 2.

<sup>d</sup> Accession numbers for the DNA database (DDBJ/EMBL/GenBank).

<sup>e</sup> These clades are shown in Fig. 2.

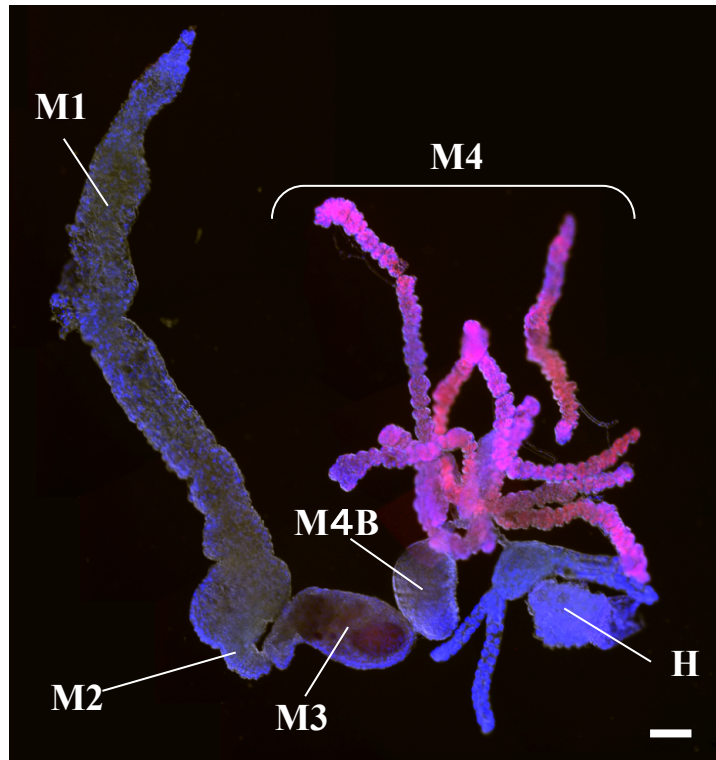

**Fig. S1.** Fluorescent in situ hybridization targeting 16S rRNA of *Betaproteobacteria* in a dissected midgut. *Betaproteobacteria* is visualized in red by hybridizing an Alexa555-conjugated BET940 probe, whereas blue signals show host insect nuclei stained with DAPI. Abbreviations: M1, midgut first section; M2, midgut second section; M3, midgut third section; M4, midgut fourth section with crypts; M4B, bulbous section before M4; H, hindgut. Bar shows 250  $\mu$ m.

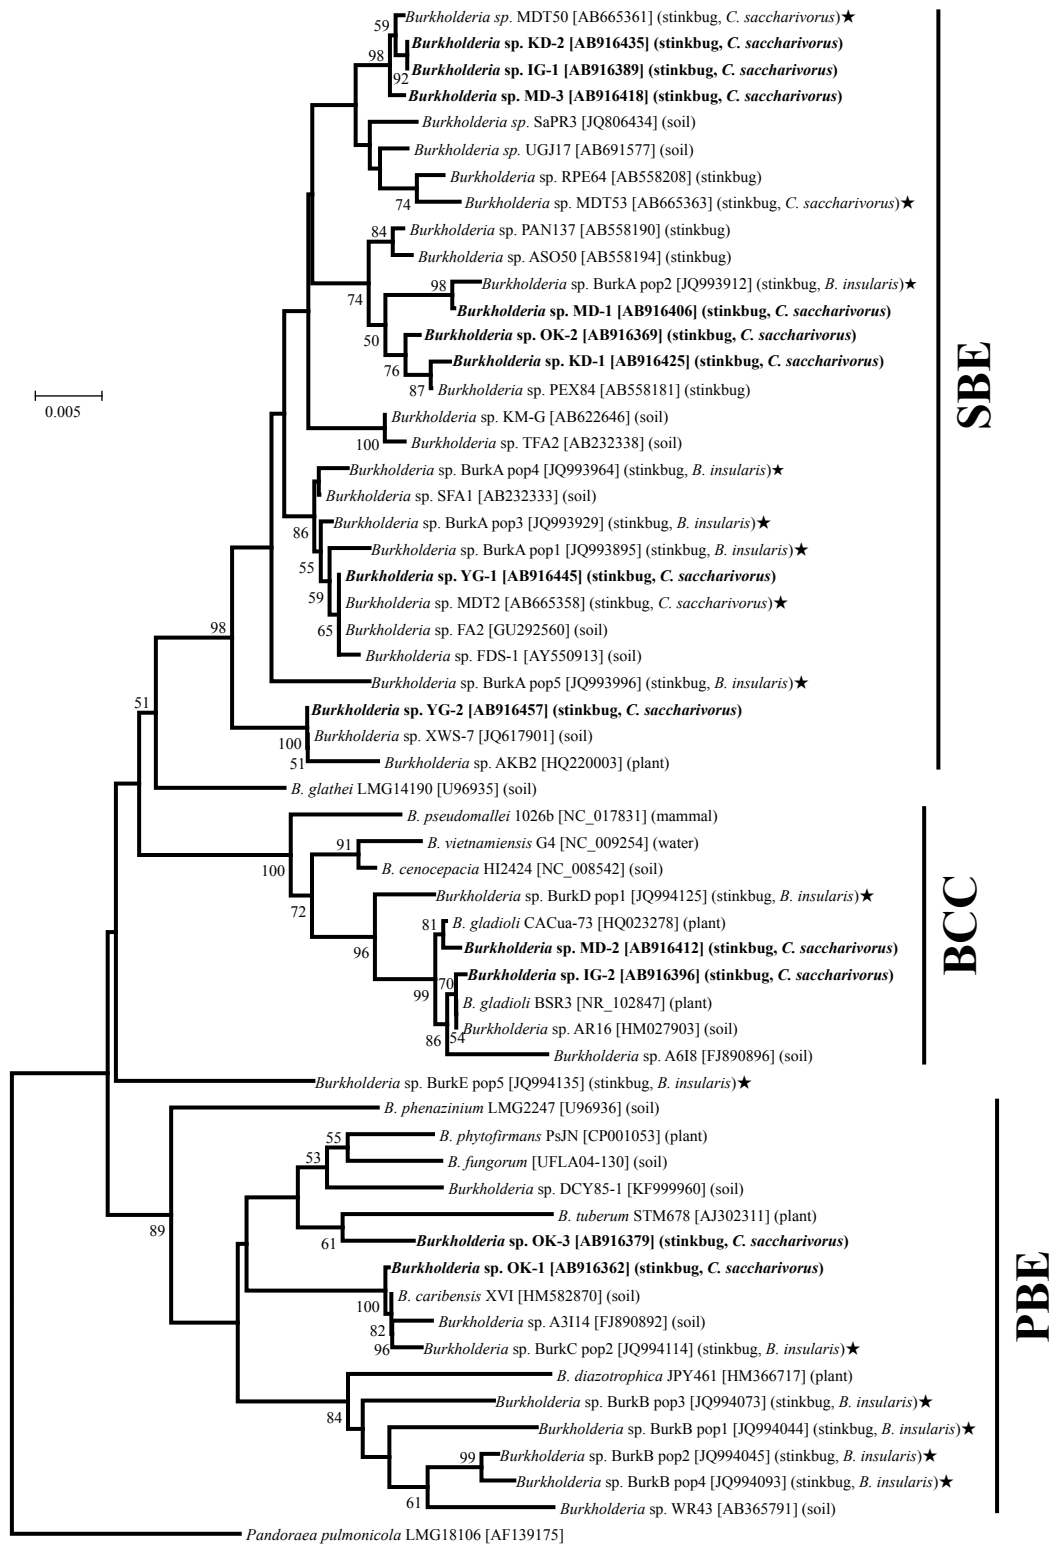

**Fig. S2.** Phylogenetic placement of the gut symbiotic bacteria of *C. saccharivorus* on the basis of the 16S rRNA gene sequences. A neighbor-joining tree inferred from aligned 1372 bp sequences of 16S rRNA gene is shown. For explanatory notes, see Fig. 2.
